# Supplementary material
Source: PubMed Central journal article supplement (PMC2923272)

### 6 months

### 9 months

### 12 months

### 15 months

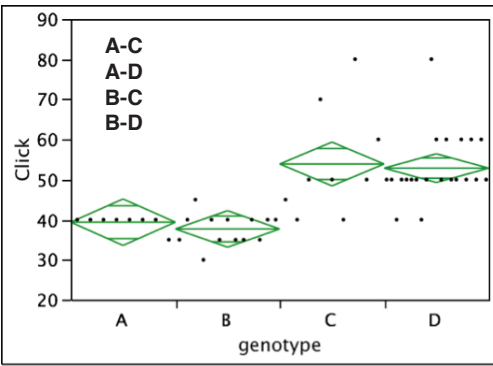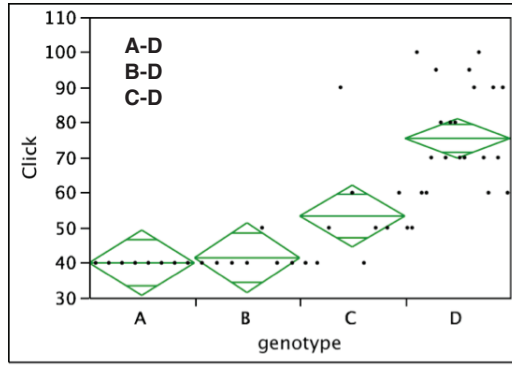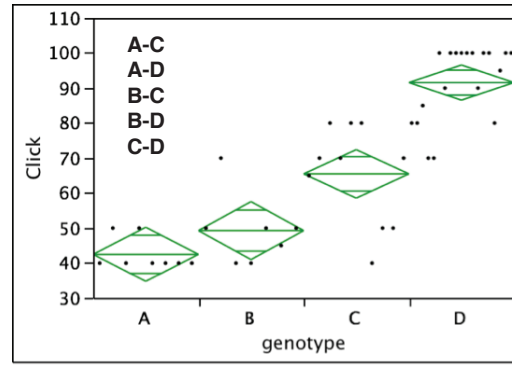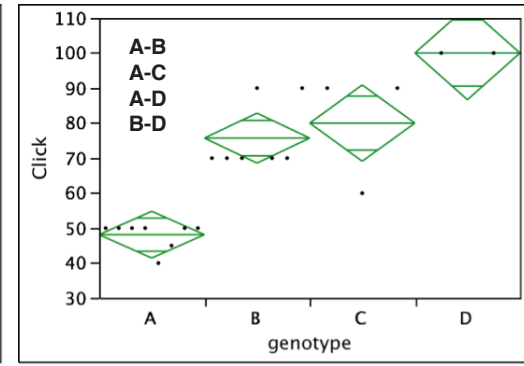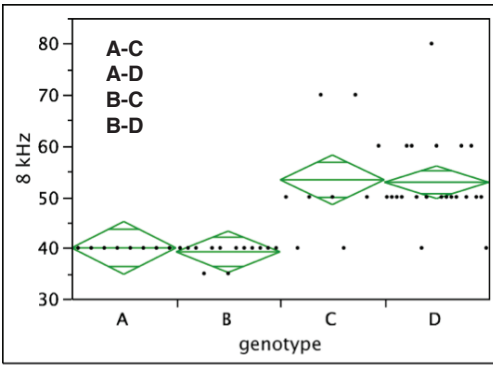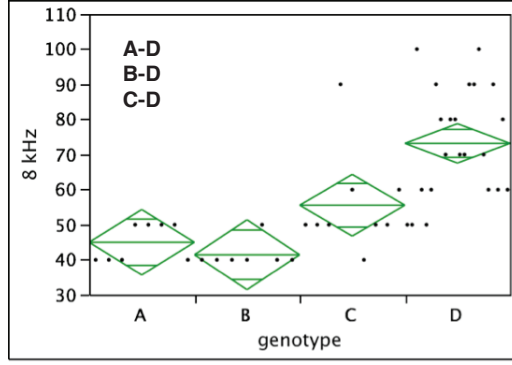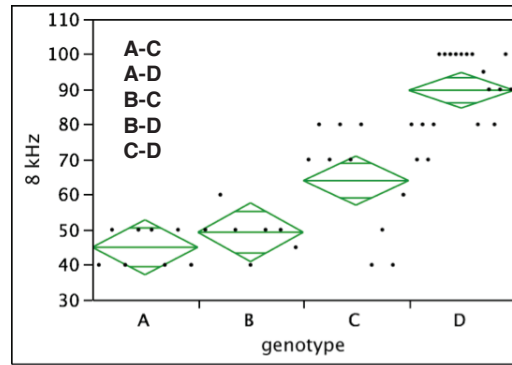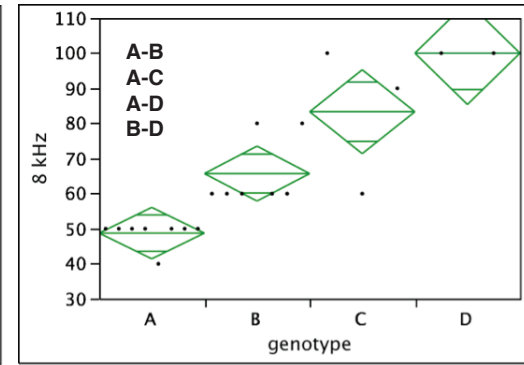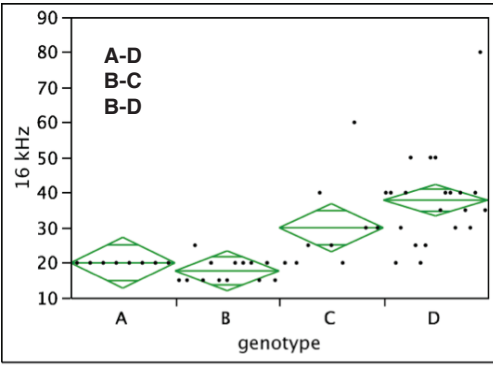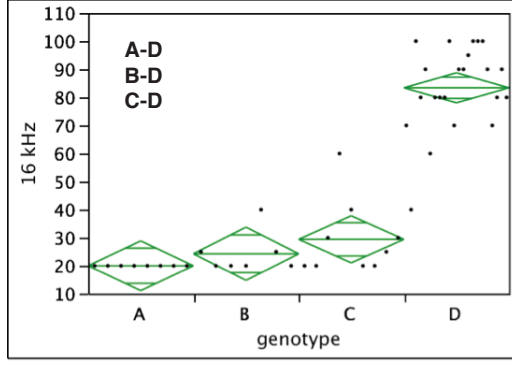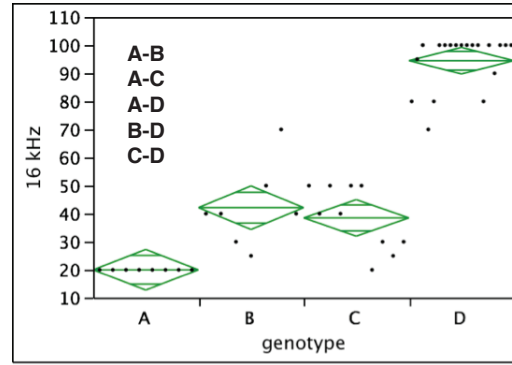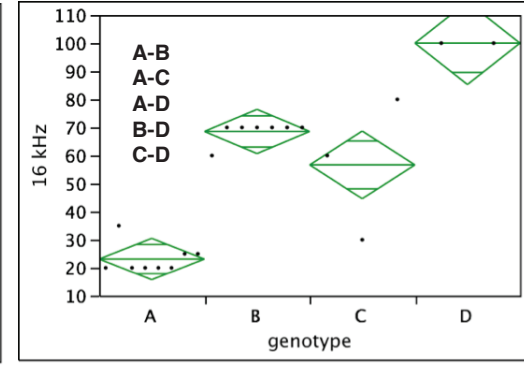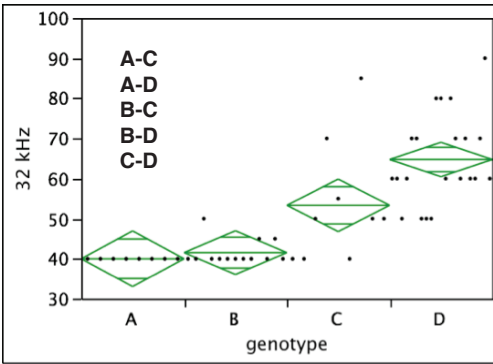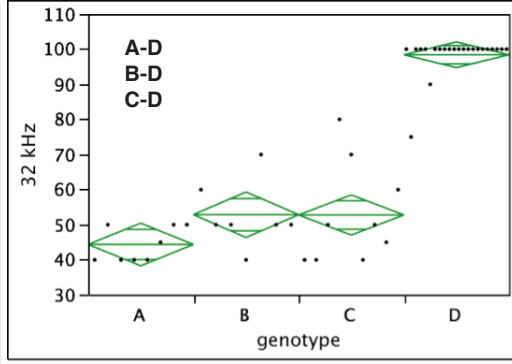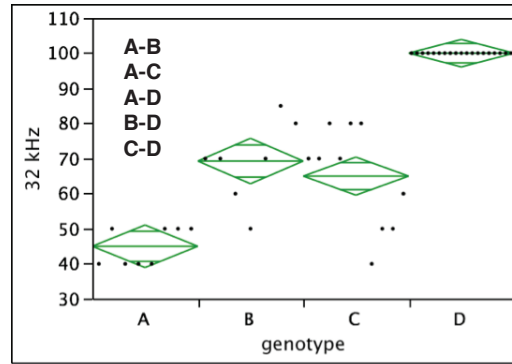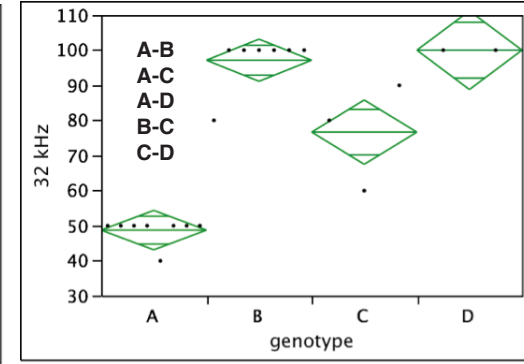

Supplement: NIHMS206492-supplement-02.pdf [file NIHMS206492-supplement-02.pdf]

### Inner Hair Cells

### Outer Hair Cells

entire cochlea

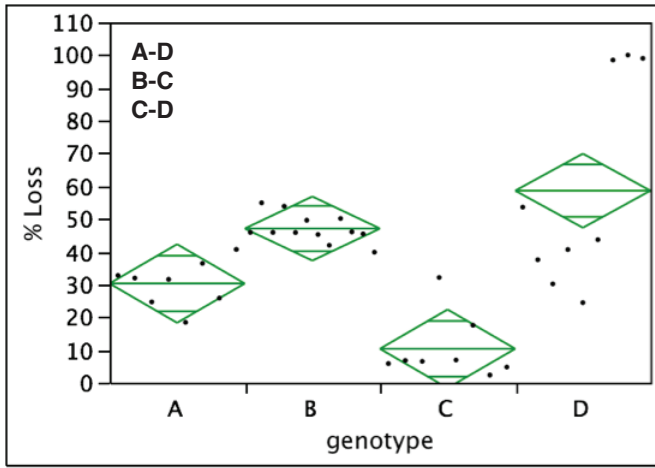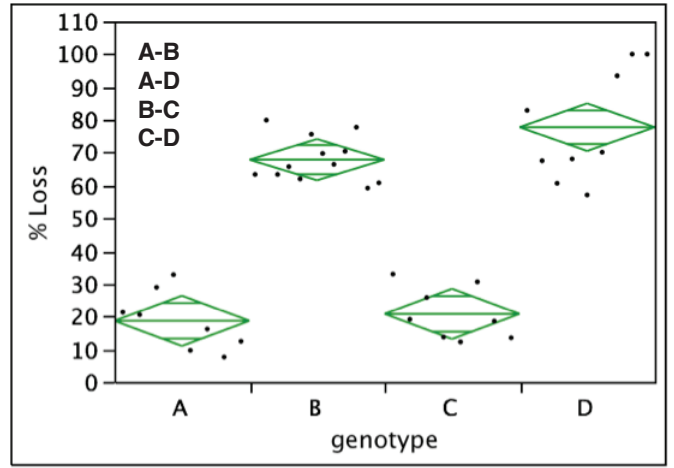

30 % from apex

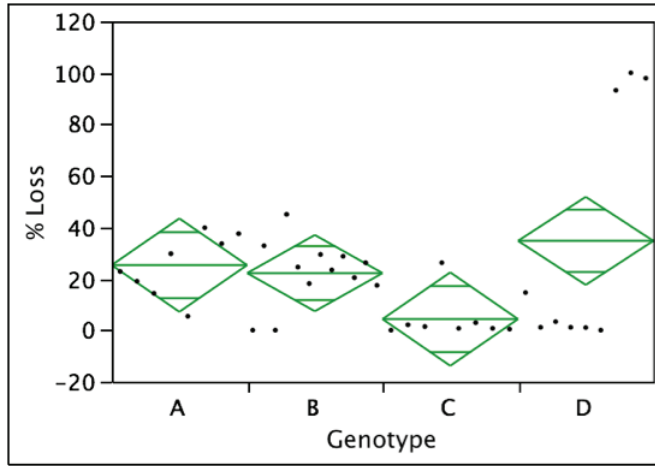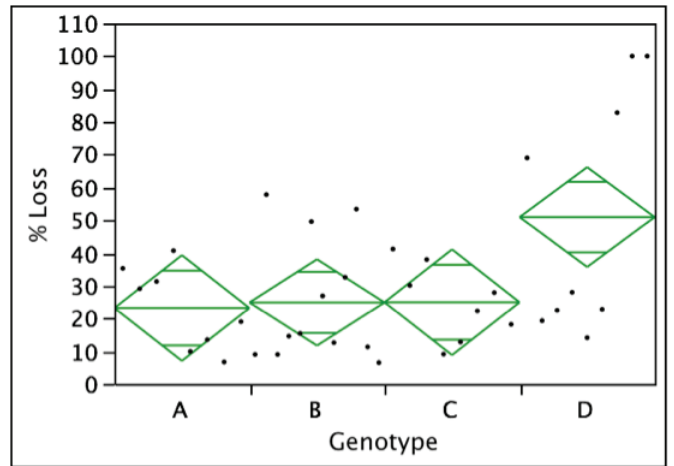

50 % from apex

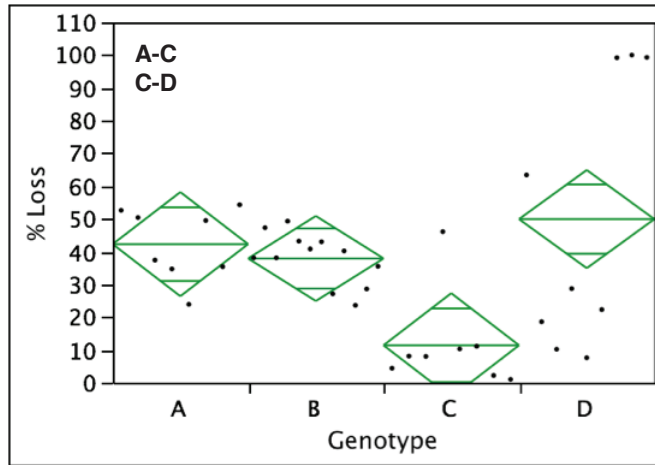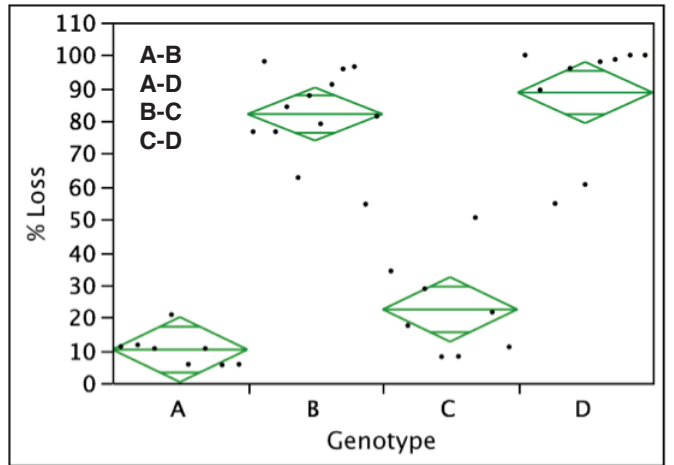

70 % from apex

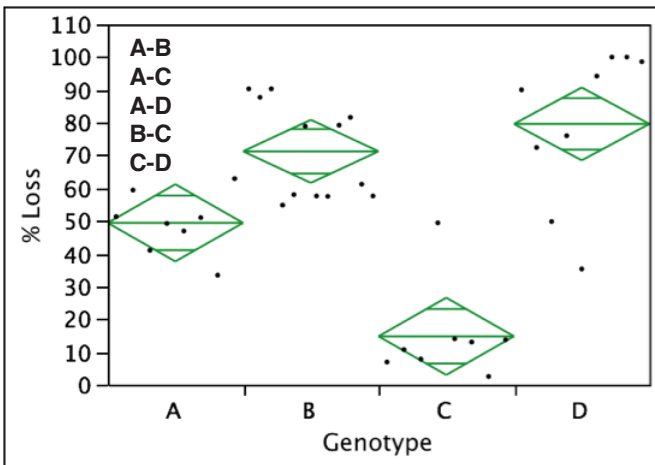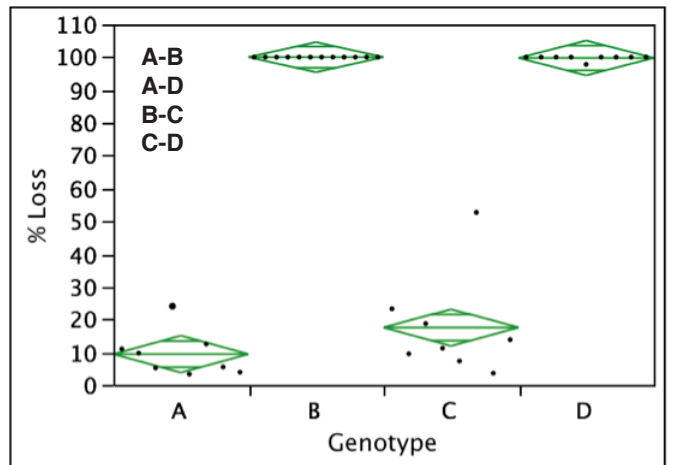

Supplement: NIHMS206492-supplement-03.pdf [file NIHMS206492-supplement-03.pdf]
